# Supplementary material
Source: publisher site journal article supplement (https://www.dovepress.com/article/375190)
Supplement: Supplementary file 1 [file get_supplementary_file.php]

# Supplementary Materials

to

## Real-world treatment of patients newly diagnosed with chronic obstructive pulmonary disease: A German claims data analysis

Roland Buhl<sup>1</sup>

Thomas Wilke<sup>2</sup>

Nils Picker<sup>3</sup>

Olaf Schmidt<sup>4</sup>

Marlene Hechtner<sup>5</sup>

Anke Kondla<sup>5</sup>

Ulf Maywald<sup>6</sup>

Claus F. Vogelmeier<sup>7</sup>

<sup>1</sup> Pulmonary Department, Mainz University Hospital, Mainz, Germany;

<sup>2</sup> IPAM e.V., Wismar, Germany;

<sup>3</sup> Cytel Inc - Ingress-Health HWM GmbH, Wismar, Germany;

<sup>4</sup> Pulmonary group practice, Koblenz, Germany;

<sup>5</sup> Boehringer Ingelheim International GmbH, Ingelheim, Germany;

<sup>6</sup> AOK PLUS, Dresden, Germany;

<sup>7</sup> Department of Medicine, Pulmonary and Critical Care Medicine, Philipps University of Marburg (UMR), Member of the German Center for Lung Research (DZL), Marburg, Germany

## List of Supplementary Figures:

**Figure S1:** Proportion of patients who started inhaled maintenance therapy for COPD within the 1st year.

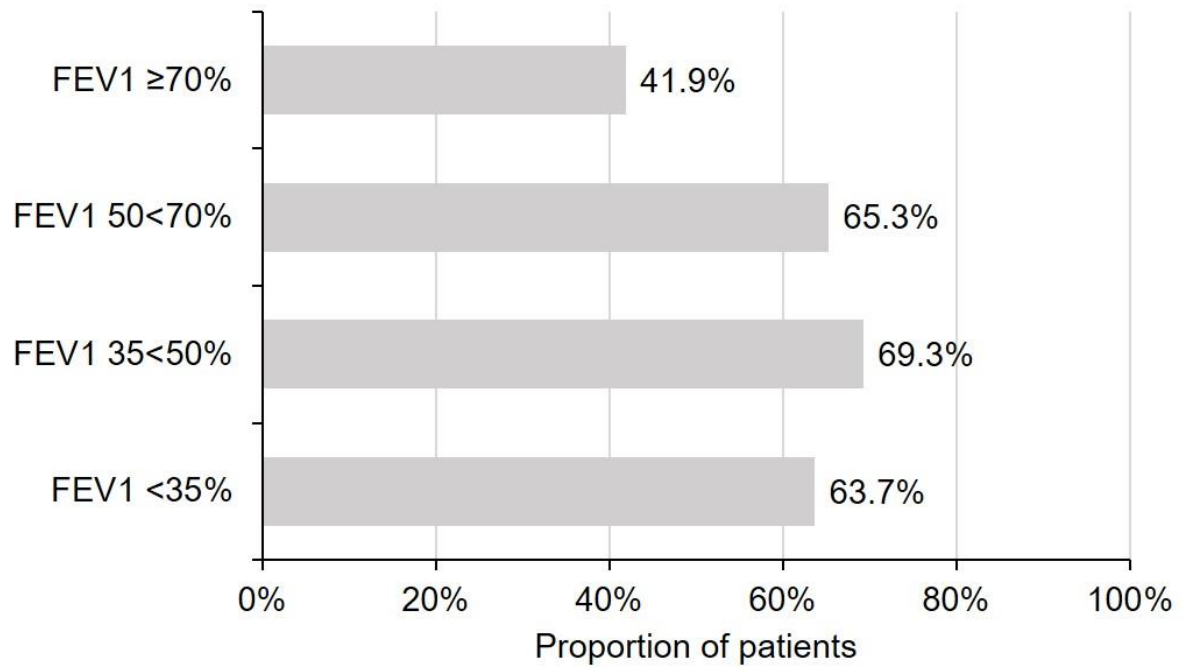

**Figure S2:** Share of COPD-related costs in total costs.

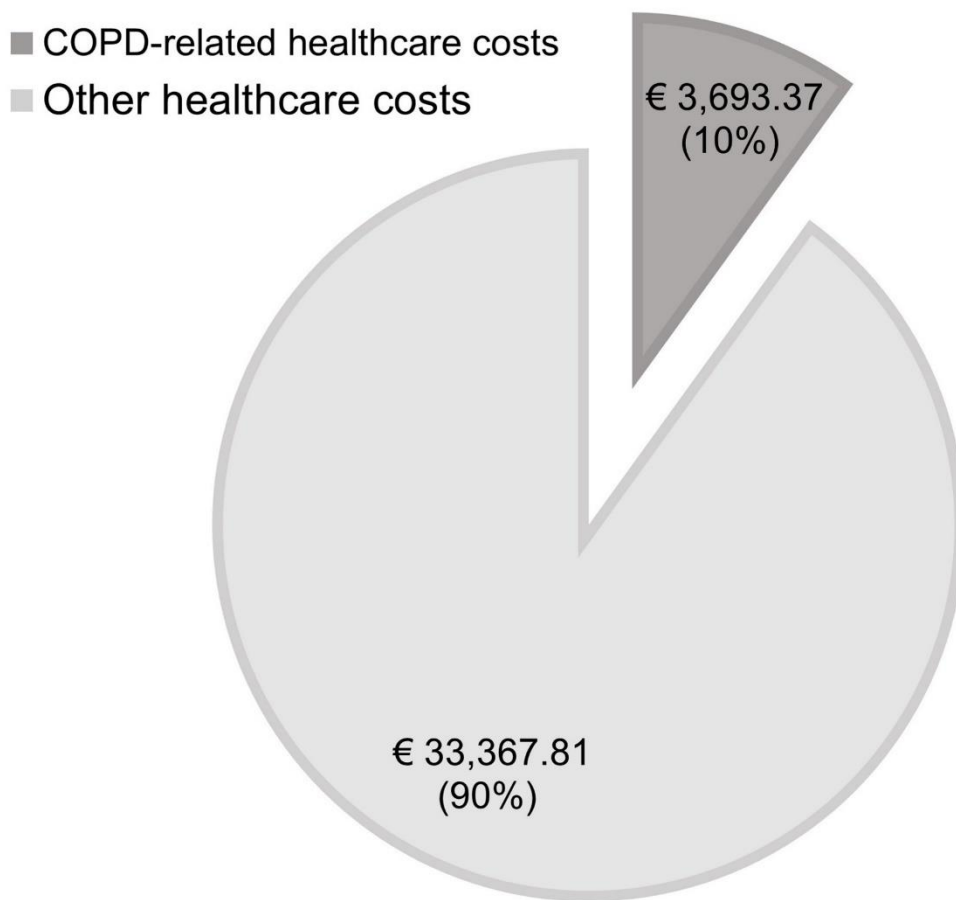

**Table S1:** ATC codes used to identify COPD-related treatments.

| Medication class | Agents                    | ATC-Codes        | Taken into account within the treatment pattern analysis |
|------------------|---------------------------|------------------|----------------------------------------------------------|
| SABA             | Salbutamol                | R03AC02          | No                                                       |
|                  | Terbutaline               | R03AC03          |                                                          |
|                  | Fenoterol                 | R03AC04; R03CC04 |                                                          |
|                  | Reproterol                | R03CC14; R03AC15 |                                                          |
| LABA             | Salmeterol                | R03AC12          | Yes                                                      |
|                  | Formoterol                | R03AC13          |                                                          |
|                  | Indacaterol               | R03AC18          |                                                          |
|                  | Olodaterol                | R03AC19          |                                                          |
|                  | Bambuterol                | R03CC12          |                                                          |
|                  | Clenbuterol               | R03CC13          |                                                          |
| LABA-combi       | Clenbuterol, combinations | R03CC63          | Yes                                                      |

| <b>Medication class</b> | <b>Agents</b>                                   | <b>ATC-Codes</b>          | <b>Taken into account within the treatment pattern analysis</b> |
|-------------------------|-------------------------------------------------|---------------------------|-----------------------------------------------------------------|
| SABA-combi              | Fenoterol and sodium cromoglycate               | R03AK03                   | No                                                              |
|                         | Salbutamol and sodium cromoglycate              | R03AK04                   |                                                                 |
|                         | Reproterol and sodium cromoglycate              | R03AK05                   |                                                                 |
| ICS/LABA                | Salmeterol and fluticasone                      | R03AK06; R03AK61          | Yes                                                             |
|                         | Formoterol and budesonide                       | R03AK07; R03AK28; R03AK72 |                                                                 |
|                         | Formoterol and beclometasone                    | R03AK08; R03AK27; R03AK71 |                                                                 |
|                         | Vilanterol and fluticasone furoate              | R03AK10                   |                                                                 |
|                         | Formoterol and fluticasone                      | R03AK11                   |                                                                 |
| SABA/SAMA               | Fenoterol and ipratropium bromide               | R03AL01                   | No                                                              |
|                         | Salbutamol and ipratropium bromide              | R03AL02                   |                                                                 |
| LABA/LAMA               | Vilanterol and umeclidinium bromide             | R03AL03                   | Yes                                                             |
|                         | Indacaterol and glycopyrronium bromide          | R03AL04                   |                                                                 |
|                         | Formoterol and acclidinium bromide              | R03AL05                   |                                                                 |
|                         | Olodaterol and tiotropium bromide               | R03AL06                   |                                                                 |
| ICS                     | Beclometasone                                   | R03BA01; R01AD01          | Yes                                                             |
|                         | Budesonide                                      | R03BA02; R01AD05          |                                                                 |
|                         | Fluticasone                                     | R03BA05; R01AD08          |                                                                 |
| SAMA                    | Ipratropium bromide                             | R03BB01; R01AX03          | No                                                              |
| LAMA                    | Tiotropium bromide                              | R03BB04                   | Yes                                                             |
|                         | Acclidinium bromide                             | R03BB05                   |                                                                 |
|                         | Glycopyrronium bromide                          | R03BB06                   |                                                                 |
|                         | Umeclidinium                                    | R03BB07                   |                                                                 |
| LABA/LAMA/ICS           | Glycopyrronium and formoterol and beclometasone | R03AL09                   | Yes                                                             |
| Methylxanthine          | Theophylline                                    | R03DA04                   | Yes                                                             |
|                         | Aminophylline                                   | R03DA05                   |                                                                 |
| PDE-4                   | Roflumilast                                     | R03DX07                   | Yes                                                             |

**Table S2: Charlson Comorbidity Score (CCI) and components.**

| <b>Comorbidity</b>                                             | <b>ICD-10 code</b>                                                    | <b>Charlson score</b> |
|----------------------------------------------------------------|-----------------------------------------------------------------------|-----------------------|
| Coronary artery disease                                        | I20-, I21-, I22-, I23-, I24-, I25-                                    | 1                     |
| Congestive heart failure                                       | I11-, I50-                                                            | 1                     |
| Peripheral vascular disease                                    | I73-, I74-, I77-                                                      | 1                     |
| Cerebrovascular disease                                        | G45-, G46-, I6-                                                       | 1                     |
| Dementia                                                       | F00-, F01-, F02-, F03-, G30-                                          | 1                     |
| Chronic pulmonary disease                                      | J4-, J6- w/o J67-, J68-, J69-                                         | 1                     |
| Connective tissue disorder                                     | M05-, M06-, M07-, M08-, M3-                                           | 1                     |
| Peptic ulcer disease                                           | K25-, K26-, K27-, K28-                                                | 1                     |
| Mild liver disease                                             | B18-, K70-, K73-, K75-                                                | 1                     |
| Diabetes mellitus without complications                        | E109-, E119-, E129-, E139-, E149-                                     | 1                     |
| Hemiplegia                                                     | G81-, G82-                                                            | 2                     |
| Moderate or severe renal disease                               | N17-, N18-, N19-                                                      | 2                     |
| Diabetes mellitus with end-organ damage                        | E10-, E11-, E12-, E13-, E14-                                          | 2                     |
| Tumor without metastases, leukemia, lymphoma, multiple myeloma | C- w/o [No 16]                                                        | 2                     |
| Moderate or severe liver disease                               | K72-, K74-, I85-                                                      | 3                     |
| Metastatic solid tumor                                         | C77-, C78-, C79-, C80-                                                | 6                     |
| AIDS                                                           | B20-, B21-, B22-, B23-, B24-                                          | 6                     |
| Age factor [excluded]                                          | For each decade $\geq 50$ years of age, 1 point is added to the score |                       |
